# Supplementary material
Source: ML conference proceedings conference paper supplement (https://openreview.net/forum?id=SRStCEJ0Qu)
Supplement: supplementary_material [file paper_with_supplementary.pdf › supplementary_material/paper_with_supplementary.pdf]

---

# SonoGym: High Performance Simulation for Challenging Surgical Tasks with Robotic Ultrasound

---

Yunke Ao<sup>1,4,5</sup> Masoud Moghani<sup>2,6\*</sup> Mayank Mittal<sup>1,6\*</sup>  
Manish Prajapat<sup>1,5</sup> Luohong Wu<sup>3,4</sup> Frederic Giraud<sup>3,4</sup>  
Fabio Carrillo<sup>4</sup> Andreas Krause<sup>1,5</sup> Philipp Frnstahl<sup>3,4,5</sup>  
<sup>1</sup>ETH Zurich <sup>2</sup>University of Toronto <sup>3</sup>University of Zurich  
<sup>4</sup>Balgrist University Hospital <sup>5</sup>ETH AI Center <sup>6</sup>NVIDIA

## Abstract

1        Ultrasound (US) is a widely used medical imaging modality due to its real-time  
2        capabilities, non-invasive nature, and cost-effectiveness. By reducing operator  
3        dependency and enhancing access to complex anatomical regions, robotic ultra-  
4        sound can help improve workflow efficiency. Recent studies have demonstrated  
5        the potential of deep reinforcement learning (DRL) and imitation learning (IL) to  
6        enable more autonomous and intelligent robotic ultrasound navigation. However,  
7        the application of learning-based robotic ultrasound to computer-assisted surgical  
8        tasks, such as anatomy reconstruction and surgical guidance, remains largely un-  
9        explored. A key bottleneck for this is the lack of realistic and efficient simulation  
10       environments tailored to these tasks. In this work, we present SonoGym, a scalable  
11       simulation platform for robotic ultrasound, enabling parallel simulation across  
12       tens to hundreds of environments. Our framework supports realistic and real-time  
13       simulation of US data from CT-derived 3D models of the anatomy through both a  
14       physics-based and a Generative Adversarial Network (GAN) approach. Our frame-  
15       work enables the training of DRL and recent IL agents (vision transformers and  
16       diffusion policies) for relevant tasks in robotic orthopedic surgery by integrating  
17       common robotic platforms and orthopedic end effectors. We further incorporate  
18       submodular DRL—a recent method that handles history-dependent rewards—for  
19       anatomy reconstruction and safe reinforcement learning for surgery. Our results  
20       demonstrate successful policy learning across a range of scenarios, while also  
21       highlighting the limitations of current methods in clinically relevant environments.  
22       We believe our simulation can facilitate research in robot learning approaches  
23       for such challenging robotic surgery applications. Dataset, codes and videos are  
24       publicly available at <https://sonogym.github.io/>.

## 1 Introduction

26       Ultrasound is a widely used medical imaging modality due to its non-invasiveness, low cost, and real-  
27       time imaging capabilities [14]. While freehand ultrasound is operator-dependent and skill-intensive,  
28       *robotic ultrasound* systems have been developed to enhance reproducibility and improve imaging  
29       efficiency [15]. Additionally, due to its ability to penetrate soft tissues, robotic ultrasound has been  
30       used for intraoperative guidance in various surgical procedures [34].

31       Robotic ultrasound has been particularly impactful and widely adopted in orthopedic surgery, which  
32       often has limited visibility and high precision requirements. These applications can be categorized  
33       into three main tasks: *navigation*, *anatomy reconstruction*, and *ultrasound-guided surgery*. For  
34       *navigation*, the ultrasound probe can be manipulated autonomously to localize and track target

---

\*Equal second author contribution.

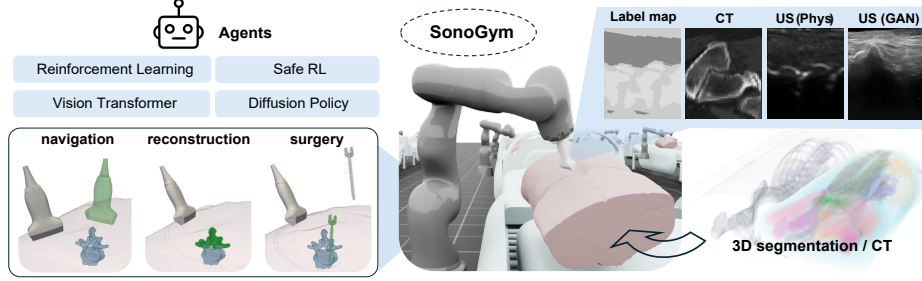

Figure 1: **Overview.** SonoGym provides model-based and learning-based ultrasound (US) simulation using 3D label map and CT scans from real patient datasets. Tasks in SonoGym include US navigation, anatomy reconstruction, and US-guided robotic surgery. SonoGym enables benchmarking of various algorithms, including reinforcement learning (RL), safe RL, vision transformer, and diffusion policy.

anatomy [48, 4]. For anatomy *reconstruction*, robotic ultrasound has been used to scan and reconstruct the dorsal surface of the spine, which can then be registered with preoperative CT images to guide surgical steps [21, 46]. While these systems employ *heuristic* path planning for the ultrasound probe, determining an *optimal* scanning path based solely on ultrasound image feedback remains a challenging open problem. Complete robotic ultrasound-guided spinal *surgery* pipelines have also been developed [19, 22], but they often rely on registration between ultrasound and preoperative CT images, lacking more intelligent planning directly informed by ultrasound image inputs.

Deep Reinforcement Learning (DRL) and Imitation Learning (IL) have shown strong potential in addressing such complex vision-based decision-making problems [16, 27, 5, 53]. Numerous studies have applied DRL and IL to autonomous robotic ultrasound *navigation* [11, 32, 20, 31]. However, their use in ultrasound-guided *reconstruction* and orthopedic *surgery* remains largely unexplored.

One key limitation to the broader use of DRL and IL in robotic ultrasound is the absence of high-performance, realistic simulation environments. In other areas of robotics, simulation-based DRL training has proven highly effective, supported by platforms such as NVIDIA IsaacLab [28], IsaacGym [25], PyBullet [6], and Mujoco [45]. The recently released NVIDIA Isaac Healthcare [31] provides a promising simulation environment including ultrasound navigation, which is along this direction. In this work, we aim to develop a more comprehensive efficient robotic ultrasound simulation platform that enables simulating not only *navigation*, but other challenging tasks covered by the ultrasound-guided surgical procedures, such as *reconstruction* and execution of *surgery*.

Our main contributions are summarized as follows: (i) We present a realistic and efficient robotic ultrasound simulation platform, SonoGym, that includes multiple real patient anatomical models from TotalSegmentator [49] and supports both model-based and learning-based ultrasound simulation, as shown in Fig.1. (ii) We propose Markov Decision Process (MDP) models for ultrasound-guided *navigation*, *reconstruction*, and *surgery*, allowing the training of high-performing DRL agents. Specifically, we adapt these models to partially observed MDPs (POMDPs), state-wise constrained MDPs [54], or submodular MDPs [35] to more effectively model these tasks. (iii) We generate expert demonstration datasets within our simulator to enable training of recent IL agents, including Action Chunking Transformer (ACT, [53]) and Diffusion Policy (DP, [5]). (iv) We conduct extensive evaluations and comparisons of DRL and IL approaches across the different tasks, analyzing their generalization performance across different ultrasound noise and different patient models; These results help assess the potential of DRL and IL and challenges remaining in this application domain.

## 2 Related Works

**Simulation platforms for robotic surgery** There are several simulation platforms tailored for different surgical tasks that allow training DRL agents. LapGym [37] provides a simulation for robot-assisted laparoscopic surgery with soft-tissue deformation based on the SOFA framework [9]. SurRol [51, 24] enables surgical robot learning compatible with the da Vinci Research Kit, based on PyBullet. Surgical Gym [38] allows training various surgical robotic arms to reach desired positions. Orbit-surgical [30, 52] provides various surgical manipulation environments with photorealistic

73 rendering, which allow training visuomotor policies with DRL or IL. So far, most existing surgical  
 74 simulation platforms focus on laparoscopic surgery or soft tissue manipulation, with few providing  
 75 realistic patient models like [30] and intraoperative medical imaging modalities such as ultrasound.

76 **Efficient ultrasound simulation** Real-time and realistic ultrasound simulation has been a long-  
 77 standing research topic. Traditional approaches employ GPU-accelerated ray tracing based on either  
 78 CT images or segmentation maps [18, 36, 41, 3, 8, 26]. We adopt a model-based simulation approach  
 79 based on [36, 18] in our framework. Recently, generative networks have also been leveraged for  
 80 ultrasound image simulation, enabling more realistic image patterns while maintaining fast inference.  
 81 For example, Liang *et al.* [23] and Alsinan *et al.* [1] explored the generation of ultrasound images  
 82 based on composite label maps or bone sketches using Generative Adversarial Networks (GAN, [10]).  
 83 Song *et al.* [43] studied learning-based CT-to-ultrasound translation with CycleGAN [55]. However,  
 84 these approaches have not been utilized for training DRL or IL agents. Although diverse and realistic  
 85 ultrasound images can also be generated using diffusion models [44, 7, 17], we adopt a GAN-based  
 86 approach [13] to maintain simulation efficiency. With a high-quality in-house paired CT-ultrasound  
 87 dataset [50], we can train effective GANs tailored for orthopedic surgery.

88 **Simulation and robot learning for robotic ultrasound** DRL or IL-based robotic ultrasound navi-  
 89 gation has been widely explored. However, most works utilize their own ultrasound sweep dataset  
 90 or simulation. For instance, Hase *et al.* [11] and Li *et al.* [20] applied deep Q-learning on in-house  
 91 collected ultrasound sweeps to learn a navigation policy for the spine. Ning *et al.* [32] develop a  
 92 robotic ultrasound environment to train a policy for ultrasound image acquisition based on RGB image  
 93 observation, therefore, their simulation only involves the RGB camera, robot and soft tissues, without  
 94 incorporating an ultrasound simulation. Ao *et al.* [2] investigate intraoperative surgical planning  
 95 based on reconstructed bone surface from ultrasound, but they only simulate noisy bone surface  
 96 reconstructions without raw ultrasound images. The recently released NVIDIA Isaac Healthcare  
 97 platform [31] provides efficient and realistic robotic ultrasound simulation for training *navigation*  
 98 policies for diagnosis. Our work further provides realistic ultrasound image simulation for orthopedic  
 99 surgery and relevant anatomy, incorporating challenging tasks such as ultrasound-guided *surgery* and  
 100 bone surface *reconstruction*.

## 101 3 Preliminaries

### 102 3.1 Reinforcement learning

103 **Markov decision process.** An MDP is a tuple of  $\langle \mathcal{S}, \mathcal{A}, \mathcal{P}, \rho, \mathcal{O}, T, \mathcal{R} \rangle$ , where  $\mathcal{S}$  is the state space  
 104 with state  $s \in \mathcal{S}$ ,  $\mathcal{A}$  is the action space with action  $a \in \mathcal{A}$ ,  $\mathcal{P}$  is the transition probability,  $\rho$  is the  
 105 initial state distribution,  $\mathcal{O}$  is the observation space with observation  $o \in \mathcal{O}$ , and  $\mathcal{R}$  is the reward space  
 106 with  $r \in \mathcal{R}$ . An episode starts at  $s_0 \sim \rho$ , and at each time step  $t \geq 0$  at state  $s_t$ , the agent receives an  
 107 observation  $o_t$  and it draws an action  $a_t$  conditioned on it according to a policy  $\pi : \mathcal{O} \times \mathcal{A} \rightarrow [0, 1]$ .  
 108 Applying this action, the simulation environment evolves to a new state  $s_{t+1}$  following the MDP  
 109 transition  $\mathcal{P}$  and receives a reward  $r(s, a)$ . For the typical RL task described above, we deploy the  
 110 proximal policy optimization (PPO, [39]) and Advantage Actor Critic (A2C, [29]) algorithms.

111 **State-wise constrained MDP.** The MDP is appended with the cost functions  $C_i : \mathcal{S} \times \mathcal{A} \rightarrow \mathbb{R}, \forall i \in$   
 112  $[m]$  with a total of  $m$  constraints [54]. The feasible policy class  $\Pi_c$  will satisfy  $\mathbb{E}[C_i(s_t, a_t)] \leq$   
 113  $w_i, \forall i \in [m]$  and  $\forall t \in [T]$  where  $w_i$  are constraint thresholds. For the state-wise constrained RL  
 114 problem, we implement a modified version of SafeRPlan [2], in which the safety distance prediction  
 115 network is adapted to predict the cost  $\hat{C}_i(s_t, a_t)$  instead of the distance. During testing, no action is  
 116 taken if any cost prediction exceeds a threshold, *i.e.*,  $\hat{C}_i(s_t, a_t) > w_i - \delta$ , where  $\delta$  is a margin that  
 117 adjusts the level of conservatism.

118 **Submodular MDP.** The MDP here is appended with non-additive trajectory-based rewards, in  
 119 contrast to state rewards defined above. We replace  $\mathcal{R}$  with a set function  $F : 2^{T \times \mathcal{S}} \rightarrow \mathbb{R}$ , which is  
 120 a monotone submodular function (*c.f.* [35]). We denote the trajectory with  $\tau$  and for each (partial)  
 121 trajectory  $\tau_{l:l'}$ , we use the notation  $F(\tau_{l:l'})$  to refer to the objective  $F$  evaluated on the set of (state,  
 122 time)-pairs visited by  $\tau_{l:l'}$ . Computationally, solving the submodular MDP problem is intractable;  
 123 however as proposed in [35], we use a PPO variant of submodular policy optimization, *i.e.*, use  
 124 marginal gain as reward at state  $r(s_t, a_t) = F(s_{t+1} | \tau_{0:t}) := F(\tau_{0:t+1}) - F(\tau_{0:t})$ . This results in  
 125 greedy maximization of rewards at each step, which is empirically shown to perform well.

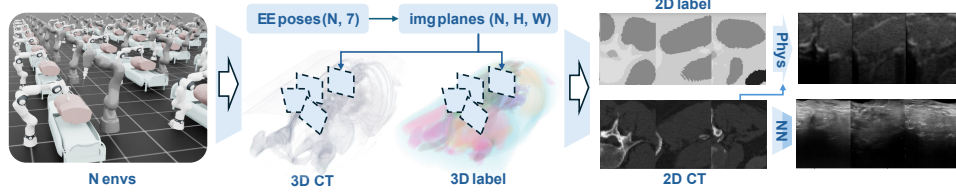

Figure 2: **Efficient ultrasound simulation across a large number of environments.** Given the current end-effector poses of the robot arms, we first compute the ultrasound image planes in the patient frames attached with 3D CT volumes and label maps. We then extract 2D CT and label slices as pixels on the plane. Ultrasound images are subsequently simulated based on these inputs using either physics-based models or neural networks.

### 3.2 Imitation Learning

**Action chunking transformer [53]** In ACT, a policy is learned to predict a sequence of actions (action chunk) given the current observation  $\pi(a_{t:t+k}|o_t)$ , where  $k$  is the sequence length. To address the noise from the expert data, the policy is trained as a conditional variational autoencoder (CVAE, [42]), using Transformer architectures [47]. During inference, the policy predict an action chunk at each time step, and the final action is smoothed using a *temporal ensemble* (averaging predictions from different previous steps).

**Diffusion policy [5]** In DP, a visuomotor policy  $\pi_\theta(a_{t:t+k}|o_{t-h:t})$  is trained using Denoising Diffusion Probabilistic Models (DDPM, [12]) to predict a sequence of actions  $A_t := a_{t:t+k}$  given the historical visual observation input  $O_t := o_{t-h:t}$ , where  $k$  is the horizon length,  $h$  is the number of steps for the latest observations. Then DDPM performs  $M$  denoising steps to generate  $A_t^{M-1}, A_t^{M-2}, \dots, A_t^0$  based on a noise prediction network  $\epsilon_\theta(O_t, A_t^m, m)$ :

$$A_t^{m-1} = \alpha(A_t^m - \gamma\epsilon_\theta(O_t, A_t^m, m) + \eta_m), \quad m = M, M-1, \dots, 1, \quad \eta_m \sim \mathcal{N}(0, \sigma^2 I),$$

where  $\alpha, \gamma, \sigma$  are determined by the noise scheduler.  $\epsilon_\theta$  is trained using pairs of Gaussian noise  $\eta_m$  and ground truth actions  $\bar{A}_t^0$  by minimizing the loss  $\|\eta_m - \epsilon_\theta(O_t, \bar{A}_t^0 + \beta_m\eta_m, m)\|^2$ , where  $\beta_m$  depends on the noise scheduler.

## 4 SonoGym Environments

Our SonoGym platform provides realistic ultrasound simulations and supports three robotic ultrasound-guided tasks: *navigation*, bone surface *reconstruction*, and spinal *surgery*, as is shown in Fig.1. In the following, we introduce the components and tasks of SonoGym in detail.

**Assets** The main components of our simulation environments include robot arms, patient models, and end effectors (surgical drills and ultrasound probes). We adopt the robot arm simulation and its corresponding inverse kinematic controllers from NVIDIA IsaacLab. We provide patient models derived from the TotalSegmentator dataset [49], which include 3D anatomical segmentations and corresponding CT images. For each patient in a subset of the dataset, we generate target trajectories on the L4 vertebra to guide robotic drilling, which serves as the objective for the *surgery* task.

**Ultrasound simulation** Our ultrasound simulation leverages patient-specific CT scans and segmentation maps, as is shown in Fig.2. Given the current end-effector poses of the robotic arm, the ultrasound image planes are computed in the patient coordinate frames. From the 3D segmentation map and CT volume attached to the patient frames, we extract the corresponding pixels on the image planes to generate 2D CT and label slices. For model-based (MB) simulation, we adopt the convolution-based method from [36] to simulate ultrasound images from the label slice, and refine the reflection term using the CT slice similar to [18]. For learning-based (LB) simulation, we train a generative model using the pix2pix framework [13] to translate CT slices into ultrasound images, leveraging a large in-house CT-to-ultrasound paired dataset collected from 7 ex-vivo spine specimens [50]. We apply intensity histogram matching between the input CT slices and a subset of training CT images to mitigate the domain gap in learning-based simulation. Both learning-based and model-based simulations are executed in batch mode across parallel environments to maintain computational efficiency.



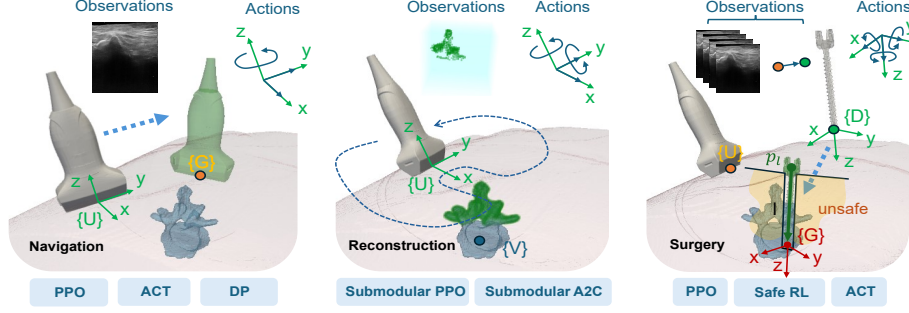

Figure 3: **Tasks.** The target anatomy (L4 vertebra) is colored blue. **Ultrasound navigation (left):** Move the ultrasound probe to the goal pose (green) based on the real-time ultrasound images. **Bone surface reconstruction (middle):** Efficiently scan the surface of the target vertebra (green) with a low path length. **Ultrasound-guided spinal surgery (right):** Fix the ultrasound probe to track the target vertebra, and drill inside the vertebra safely based on the ultrasound image and tracked poses of the ultrasound probe and drill. Supported algorithms are illustrated below each task.

#### 159 4.1 Task 1: Ultrasound navigation

160 **Task description:** We consider the problem of navigating an ultrasound probe to locate a target  
 161 anatomy, starting from a random initial position on the back of the patient. The target pose of the  
 162 ultrasound probe with frame  $\{U\}$  is represented by a fixed goal frame  $\{G\}$  located above the target  
 163 anatomy, shown in orange in Fig.3 (left). In practice, the precise frame of the target anatomy  $\{G\}$  is  
 164 typically *unknown* in a real patient. However, the real-time ultrasound image partially visualizes the  
 165 underlying anatomy and implicitly encodes the position of the probe relative to the patient, which  
 166 can be exploited for navigation. To ensure continuous image acquisition, the ultrasound probe must  
 167 maintain stable contact with the skin. We assume this contact is maintained by an existing low-level  
 168 robot controller, which also enforces the probe to remain perpendicular to the skin surface (*i.e.*, the  
 169  $z$ -axis of the probe aligns with the local surface normal). Our focus is solely on task-space planning  
 170 of the *3 DoF tangential motion* of the ultrasound probe along the skin surface to reach the goal frame.

171 **States and observations:** The state  $s_t \in \mathcal{S} \subseteq \mathbb{R}^6$  consists of the relative position  ${}^G_U p_t \in \mathbb{R}^3$  and  
 172 angle-axis orientation  ${}^G_U q_t \in \mathbb{R}^3$  between the ultrasound probe frame  $U$  and the goal frame  $G$ . The  
 173 observation is the real-time ultrasound image feedback  $o_t \in \mathcal{O} \subseteq \mathbb{R}^{H \times W}$ , where  $H, W$  denote the  
 174 height and width of the images, respectively.

175 **Actions and reward:** The action is defined over the remaining degrees of freedom in the  $U$  frame:  
 176  $a_t := [\Delta x_t, \Delta y_t, \Delta \alpha_t]^\top \in \mathbb{R}^3$ , where  $[\Delta x_t, \Delta y_t]^\top$  represents horizontal translations on the skin  
 177 surface (along the  $x$  and  $y$  axes of  $U$ , shown green in Fig. 3 (left)), and  $\Delta \alpha_t$  denotes rotation around  
 178 the surface normal (the  $z$  axis of  $\{U\}$ ). The reward is defined as the change in distance to the goal  
 179 frame:  $r_t = w_1(\|{}^G_U p_t\| - \|{}^G_U p_{t+1}\|) + \|{}^G_U q_t\| - \|{}^G_U q_{t+1}\|$ , where  $w_1$  is a tunable weight.

180 **Agents:** We support training high-performing PPO agents for the navigation task, where we use a  
 181 shared convolutional neural network (CNN) encoder for the policy and value networks. Furthermore,  
 182 we provide datasets for the training of imitation learning agents (such as ACT and DP), which are  
 183 collected with an *expert policy* based on the true state  ${}^G_U p_t$  and  ${}^G_U q_t$ . The *expert policy* is defined  
 184 as  $a_t^* = \rho_1[{}^G_U p_t \cdot e_x, {}^G_U p_t \cdot e_y, {}^G_U q_{t+1} \cdot e_z]^\top$ , where  $\rho_1 < 1$  is the proportional scaling parameter,  
 185  $e_x, e_y, e_z$  denotes the unit vectors along the  $x, y, z$  axes of  $\{U\}$ . We train ACT and DP with the  
 186 default architecture described in [53, 5].

#### 187 4.2 Task 2: Bone surface reconstruction

188 **Task description:** We consider the robotic ultrasound spine surface reconstruction problem following  
 189 the setup in [21], and simplify the task to reconstruct only the surface of a single vertebra. We assume  
 190 the bone surface can be segmented from each 2D ultrasound image using methods such as [33]. By  
 191 combining these segmentations across frames together with the tracked pose of ultrasound probes, a  
 192 3D reconstruction of the vertebra surface can be obtained. Our task focuses on optimal path planning  
 193 of the ultrasound probe on the skin surface to enable fast and sufficient reconstruction, as is shown

in Fig. 3 (middle). Compared to the navigation task setting, we additionally allow adjustment of the pitch angle (rotation around the  $y$ -axis of the  $\{U\}$  frame) to capture more surface points. This planning problem is challenging because the pose of the target vertebra  $\{V\}$  is unknown, requiring the planner to balance exploration and exploitation based on the current reconstruction.

**State and observations:** Our state  $s_t$  is the (unknown) position  ${}^U_V p_t \in \mathbb{R}^3$  and angle-axis orientation  ${}^U_V q_t \in \mathbb{R}^3$  of the ultrasound probe in the target vertebra frame  $\{V\}$ . The observation is defined as the current reconstruction  $\mathcal{M}_{0:t}$  transformed to the current ultrasound frame  ${}_U \mathcal{M}_{0:t}$  and voxelized to a 3D image of shape  $H \times W \times E$ , as is shown in Fig.3 (middle), where  $H, W, E$  denote the image height, width, and elevation, respectively. It partially encodes the current reconstruction status and the relative poses  ${}^U_V p_t, {}^U_V q_t$ .

**Actions and reward:** The 4D action is defined as  $a_t := [\Delta x_t, \Delta y_t, \Delta \alpha_t, \Delta \beta_t]^\top$ , corresponding to translation along  $x, y$  axes and rotation around  $z, y$  axes in  $\{U\}$  frame. The trajectory objective function  $F$  accounts for both the total number of acquired surface points and the trajectory length, and is given by:  $F(\tau_{0:t}) := |\mathcal{M}_{0:t}| - w_2 \sum_{h=0}^t (|\Delta x_t| + |\Delta y_t| + w_3 |\Delta \alpha_t| + w_3 |\Delta \beta_t|)$ , where  $w_2, w_3$  are tunable weights,  $|\mathcal{M}_t|$  denotes the area of the surface  $\mathcal{M}_{0:t}$ .

**Agents:** We support training submodular PPO and A2C as high-performing policy gradient methods. The policy and value functions share a CNN encoder, with separate heads for actions and values. For comparison, we also provide heuristic open-loop path planning, following the approach in [21].

### 4.3 Task3: Ultrasound-guided surgery

**Task description:** We consider the ultrasound-guided path planning problem in robotic bone drilling for pedicle screw placement. During surgery on a real patient, the exact position of the target vertebra to be drilled is not directly known. To localize the target vertebra, we assume a 3D ultrasound probe is navigated above the region of interest, as shown in Fig.3 (right), continuously acquiring volumetric ultrasound images  $I_t \in \mathbb{R}^{H \times W \times E}$ . The poses of both the ultrasound probe frame  $\{U\}$  and the drill frame  $\{D\}$  are tracked by the robotic tracking system. The objective is to safely and accurately drill into the vertebra by following a predefined path (green in Fig. 3 (right)), using the acquired ultrasound images and pose tracking. This path starts from a point  $p_l$  on the skin surface and leads to a target goal frame ( $\{G\}$ , red), which is defined by the surgeon directly on the vertebra.

**States and observations:** The state  $s_t \in \mathcal{S} \subseteq \mathbb{R}^6$  consists of the relative position  ${}^D_G p_t \in \mathbb{R}^3$  and angle-axis orientation  ${}^D_G q_t \in \mathbb{R}^3$  between the goal frame  $\{G\}$  and the current drill frame  $\{D\}$ . The observation  $o_t$  includes the volumetric ultrasound images  $I_t$  and the tracked relative pose between the ultrasound probe and the drill,  $[{}^U_V p_t, {}^U_V q_t] \in \mathbb{R}^7$ , where  ${}^U_V q_t$  is a quaternion. To simulate noise in ultrasound-based navigation, we randomize the position of the ultrasound probe above the target vertebra by up to a user-specified threshold  $\lambda$ .

**Actions, reward and cost:** The action is defined as the 6D command for the drill in  $\{D\}$  frame:  $a_t := [{}_D \Delta p_t, {}_D \Delta q_t]$ , where  ${}_D \Delta p_t$  is the translation and  ${}_D \Delta q_t$  is the rotation vector. While the drill can move freely outside the patient, it must remain within a narrow region once inside to ensure safety, as illustrated in Fig. 3 (right). To facilitate reward design, we define the free region  $\mathcal{C}_{\text{free}}$  and drilling region  $\mathcal{C}_{\text{drill}}$  in  $\{G\}$  as follows:

$$\mathcal{C}_{\text{drill}} := \{p \mid \sqrt{p_x^2 + p_y^2} \leq \frac{d}{2}, -l \leq p_z \leq 0\}, \quad \mathcal{C}_{\text{free}} := \{p \mid p_z \leq -l\},$$

where  $p_x, p_y, p_z$  are the  $x, y, z$  components of the arbitrary position  $p$ ,  $l$  is the distance from skin to the goal,  $d$  is the diameter of the drill region. The remaining space is defined as the unsafe region  $\mathcal{C}_{\text{unsafe}}$ . The reward is defined as

$$r_t := \begin{cases} w_4 (\|{}_G^D p_t - p_l\| - \|{}_G^D p_{t+1} - p_l\|) + w_5 (\|{}_G^D q_t\| - \|{}_G^D q_{t+1}\|), & \text{if } {}^D_G p_t \in \mathcal{C}_{\text{free}}, \\ w_6 (\|{}_G^D p_t\| - \|{}_G^D p_{t+1}\|) + w_5 (\|{}_G^D q_t\| - \|{}_G^D q_{t+1}\|), & \text{if } {}^D_G p_t \in \mathcal{C}_{\text{drill}}, \end{cases}$$

and 0 otherwise. Here  $p_l := [0, 0, l]$  is the surface point directly above the goal,  $w_4, w_5, w_6$  are tunable weights. This reward encourages agents to first reach the skin point  $p_l$  before beginning the drilling process. The cost for the state-wise constrained MDP is the indicator function of the unsafe region  $c_t := \mathbb{I}[{}_G^D p_t \in \mathcal{C}_{\text{unsafe}}]$ .

**Agents:** We provide both PPO and modified SafeRPlan agents for the task. A CNN and an MLP are used as encoders for the image and relative pose observations, respectively. We also provide datasets

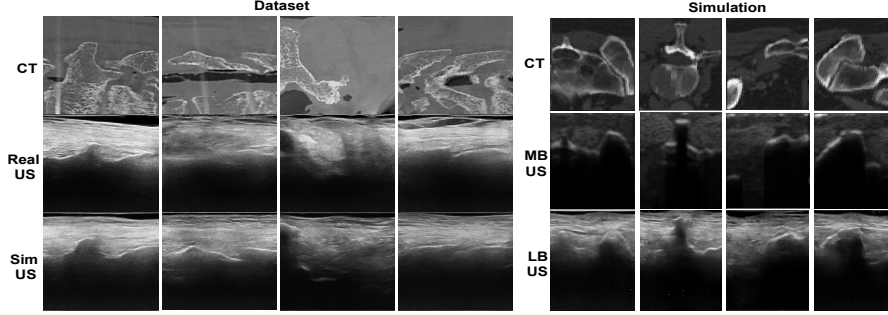

Figure 4: **Qualitative evaluation of US simulation.** (left) real and generated US images from our network in testing datasets. (right) sliced CT, model-based (MB) US simulation and learning-based (LB) US simulation. The LB US simulation has high visual similarity to real images.

collected from an expert policy (with expert action  $a_t^*$ ), which moves the drill towards the skin point  $p_t$  first, then towards  $\{G\}$ . We support the training of ACT using the collected dataset.

## 5 Experiments

In this section, we validate the proposed environments and compare the performance of RL and IL algorithms.

**Metrics** We quantitatively evaluate the ultrasound simulation quality via learned Perceptual Image Patch Similarity (LPIPS), Structural Similarity Index Measure (SSIM), and Peak Signal-to-Noise Ratio (PSNR) on a testing dataset. We evaluate task performance using environment-specific metrics: **Navigation:** Final 2D *position error* (projected onto the frontal plane of the patient) and *rotation error* (around the frontal axis); **Reconstruction:** *Coverage ratio* (reconstructed vs. total upper surface points), *total rotation angle*, and *trajectory length*; **Surgery:** *Insertion error* (position error along the  $z$ -axis of  $\{G\}$ ), *side error* (position error perpendicular to the  $z$ -axis of  $\{G\}$ ), *rotation error* (angle between final drill direction and  $z$ -axis of  $\{G\}$ ) and *safe ratio* (the proportion of trajectory states within the safe region).

**Experiment setup** We train both PPO and A2C agents for all environments. We also train modified SafeRPlan agents (PPO + safety filter) for the *surgery* task. For the *navigation* and *surgery* tasks, we evaluate the PPO agents on the same type of simulation used during training, corresponding to the ‘MB’ and ‘LB’ groups in Fig. 6 and In-Domain Test (IDT) columns in Tab. 1. To evaluate generalization to varying ultrasound noise conditions, we first train 5 ultrasound simulation networks with a same dataset and different random seeds. We then train agents with 4 of these networks and test them with the 5th network, denoted as Out-of-Domain Test (ODT) columns of ‘LB’ rows in Tab. 1 and ‘LB\_ODT’ in Fig. 6. For the *surgery* task, we also tested generalization across patients by training PPO and PPO + safety filter on 5 patients and evaluating on a held-out sixth, corresponding to the ODT columns of the ‘MB’ group in Tab. 1. For the reconstruction task, PPO policies were directly evaluated on the same patient and noise distribution.

### 5.1 Environment Validation

**Q1: How realistic and efficient is the ultrasound simulation?** Fig. 4 presents a qualitative evaluation of the ultrasound images generated by our pix2pix network. Fig. 4 (left) shows that our network can simulate realistic images during testing. Fig. 4 (right) provides examples of both model-based (MB) and learning-based (LB) ultrasound simulations. Our LB approach maintains high visual quality despite the domain gap between the input CT slices and the training CT data. For quantitative metrics, we achieve LPIPS loss of 0.2415, SSIM score of 0.3940, and PSNR score of 15.96, which is close to the performance of similar works reported in [7]. On an RTX 3090 Ti, the parallel rendering of ultrasound images with size  $200 \times 150$  of 100 environments takes 0.0089 and 0.1107 seconds for MB and LB approaches, respectively. This enables training high-performing PPO agents within approximately 2 hours for MB simulations and 10 hours for LB simulations.

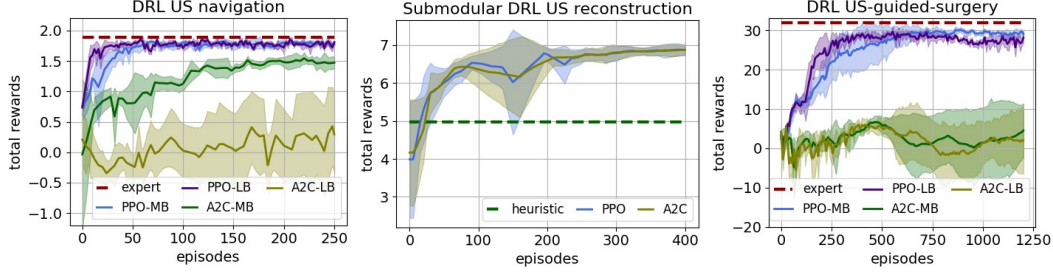

Figure 5: **Learning curves of reinforcement learning agents for all tasks.** The shaded region represents the 1-sigma confidence interval across training runs with five different random seeds. Our modeling allows stable training of PPO agents, which can achieve close performance to expert policies and better performance than A2C agents for *navigation* and *surgery* tasks. For *reconstruction*, both submodular PPO and A2C agents surpass the heuristic trajectory during the learning process.

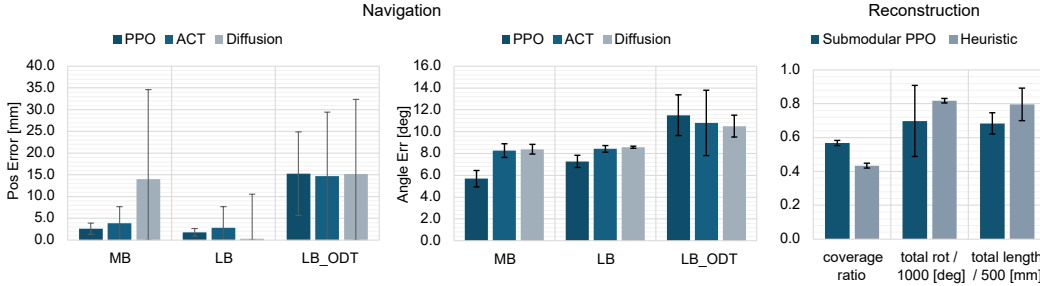

Figure 6: **Performance for navigation and reconstruction.** Results are averaged over 100 trials, and error bars denote the standard deviation. The gaps between LB\_ODT and LB are not significant, which demonstrates the potential of sim-to-real transfer over the ultrasound imaging domain. For reconstruction, the submodular PPO policy surpasses the performance of the heuristic policy.

## Q2: How effective are the MDP formulations and reward design for different tasks?

Fig. 5 shows the training curves for all 3 environments with PPO and A2C. For *navigation* and *surgery* tasks, PPO can achieve close performance to the expert policy (red, based on full states) and better performance than A2C. For reconstruction, both PPO and A2C policies outperform the heuristic trajectory adopted by existing works [21]. As is also demonstrated by Fig. 6 (middle), the learned trajectory exhibits a higher coverage rate (reconstructed points divided by total points) with lower total rotation angles and path length than the heuristic policy.

An example learned trajectory with a circular shape is shown in Fig. 7 (left), which is intuitively more efficient than the heuristic trajectory (right) composed mainly of vertical and horizontal segments.

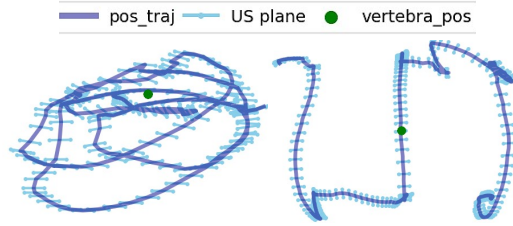

Figure 7: **Learned and heuristic trajectories for the Reconstruction task.** (left) The learned trajectory exhibits a circular pattern around the target vertebra; (right) the fixed heuristic trajectory.

## 5.2 Comparison study

**Q3: How do RL algorithms compare with IL algorithms in different tasks?** Fig. 6 (left) and (middle) show the comparison between PPO, ACT and DP in the *navigation* task. PPO has lower position tracking variance compared to IL approaches. PPO achieves better rotation tracking accuracy. Comparison between PPO, PPO with safety filter and ACT in the *surgery* task is shown in Table. 1. In general, PPO and PPO with safety filter are more safety-aware (higher safety ratio) than ACT. They also achieves lower side position error, which can be due to the larger weight on tracking reward in the drilling region.

Table 1: Performance of different approaches on the *surgery* task. SF abbreviates safety filter. All values are averaged over 100 trials. The comparable performance between ODT and IDT for LB demonstrates the potential of existing approaches to generalize across the US imaging models.

| US sim | Algos    | side err ↓[mm] |             | insert err ↓[mm] |             | rot err ↓[deg] |             | safe ratio ↓[%] |             |
|--------|----------|----------------|-------------|------------------|-------------|----------------|-------------|-----------------|-------------|
|        |          | IDT            | ODT         | IDT              | ODT         | IDT            | ODT         | IDT             | ODT         |
| MB     | PPO      | 2.32           | <b>5.66</b> | 16.0             | 20.5        | 5.11           | 4.54        | 99.9            | 88.3        |
|        | PPO + SF | <b>2.17</b>    | 8.94        | 13.9             | 27.3        | 5.36           | <b>4.55</b> | <b>100.0</b>    | <b>89.8</b> |
|        | ACT      | 5.38           | 18.4        | <b>2.92</b>      | <b>14.5</b> | <b>0.62</b>    | 5.98        | 65.9            | 65.3        |
| LB     | PPO      | 5.42           | 6.41        | 12.3             | 26.9        | 3.7            | 3.76        | 93.1            | 93.1        |
|        | PPO + SF | <b>5.07</b>    | <b>4.56</b> | 11.9             | 27.2        | 3.93           | 3.59        | <b>95.3</b>     | <b>96.0</b> |
|        | ACT      | 5.34           | 6.26        | <b>1.62</b>      | <b>1.72</b> | <b>1.01</b>    | <b>1.81</b> | 86.0            | 80.3        |

On the contrary, ACT generally has lower safety rates but higher tracking accuracy along the insertion direction. Fig. 8 also demonstrates that PPO trajectories are more ‘conservative’ by being concentrated around the goal direction and keeping a margin from the goal position.

**Q4: Can pretraining on multiple ultrasound simulation models and patients enable zero-shot generalization to unseen ultrasound noise and patients?** The generalization performance of PPO, ACT and Diffusion policy over observation domain gaps in the *navigation* task is demonstrated in Fig. 6 (left) and (middle), ‘LB\_ODT’ groups. The results show that all approaches achieve position errors of less than 16[mm] and rotation errors less than 12[deg], which is still acceptable for *navigation*. For the *surgery* task, the generalization results (‘ODT’ columns of ‘LB’ group) in general has a similar level of performance, with slightly higher *insertion error* and lower safe ratio, as is shown in Tab. 1. This shows the potential of training existing approaches with multiple ultrasound simulation networks to address the sim-to-real gap between images. As for testing on a new patient (ODT columns of MB in Tab. 1), both the *safe ratio* and *side error* have a large gap to the IDT columns. This result shows that generalization across different patients are still challenging, especially with limited diversity of patient models.

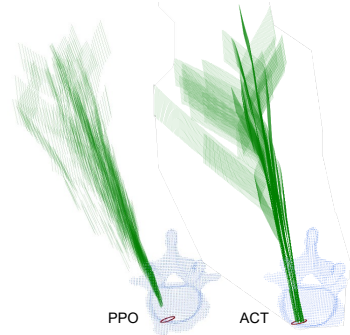

Figure 8: **Example trajectories for the *surgery* task.** The example trajectories, target vertebra and the goal position are colored green, blue, and red, respectively. PPO trajectories have less variance and stop at a certain distance from the goal, while ACT policies are less conservative and smoother.

## 6 Conclusion

We introduce SonoGym, a scalable simulation platform designed for complex robotic ultrasound tasks, offering fast physics-based and realistic learning-based image generation. The platform includes MDP models and expert datasets for ultrasound-guided navigation, bone reconstruction, and spinal surgery, enabling effective training of reinforcement learning and imitation learning agents. Our results highlight the potential of these approaches for sim-to-real generalization over the imaging domain gap. We also identify challenges in generalization over inter-patient variability when relying on limited patient data.

**Limitations and future work** Several limitations exist for our approach. We generated high-quality ultrasound images using a GAN-based approach; however, the current model does not incorporate physics-based constraints. Additionally, the patient models—comprising 3D label maps and CT scans—remain static and do not account for soft tissue deformation. The results were obtained from a limited number of patient samples and have not yet been scaled to represent a broader population. Future research directions include improving ultrasound simulation quality and diversity, modeling soft tissue deformation, scaling to larger patient populations, improving generalization over different patients, and validation with real systems in clinical settings.

## References

- [1] Ahmed Z Alsinan, Charles Rule, Michael Vives, Vishal M Patel, and Ilker Hacihaliloglu. Gan-based realistic bone ultrasound image and label synthesis for improved segmentation. In *Medical Image Computing and Computer Assisted Intervention–MICCAI 2020: 23rd International Conference, Lima, Peru, October 4–8, 2020, Proceedings, Part VI* 23, pages 795–804. Springer, 2020.
- [2] Yunke Ao, Hooman Esfandiari, Fabio Carrillo, Christoph J Laux, Yarden As, Ruixuan Li, Kaat Van Assche, Ayoob Davoodi, Nicola A Cavalcanti, Mazda Farshad, et al. Saferplan: Safe deep reinforcement learning for intraoperative planning of pedicle screw placement. *Medical Image Analysis*, 99:103345, 2025.
- [3] Benny Burger, Sascha Bettinghausen, Matthias Radle, and Jürgen Hesser. Real-time gpu-based ultrasound simulation using deformable mesh models. *IEEE transactions on medical imaging*, 32(3):609–618, 2012.
- [4] Tingxiu Chen, Yilei Shi, Zixuan Zheng, Bingcong Yan, Jingliang Hu, Xiao Xiang Zhu, and Lichao Mou. Ultrasound image-to-video synthesis via latent dynamic diffusion models. In *International Conference on Medical Image Computing and Computer-Assisted Intervention*, pages 764–774. Springer, 2024.
- [5] Cheng Chi, Zhenjia Xu, Siyuan Feng, Eric Cousineau, Yilun Du, Benjamin Burchfiel, Russ Tedrake, and Shuran Song. Diffusion policy: Visuomotor policy learning via action diffusion. *The International Journal of Robotics Research*, page 02783649241273668, 2023.
- [6] Erwin Coumans and Yunfei Bai. Pybullet, a python module for physics simulation for games, robotics and machine learning. <http://pybullet.org>, 2016–2019.
- [7] Marina Domínguez, Yordanka Velikova, Nassir Navab, and Mohammad Farid Azampour. Diffusion as sound propagation: Physics-inspired model for ultrasound image generation. In *International Conference on Medical Image Computing and Computer-Assisted Intervention*, pages 613–623. Springer, 2024.
- [8] Felix Ducloux, Mohammad Farid Azampour, and Nassir Navab. Ultraray: Full-path ray tracing for enhancing realism in ultrasound simulation. *arXiv preprint arXiv:2501.05828*, 2025.
- [9] François Faure, Christian Duriez, Hervé Delingette, Jérémie Allard, Benjamin Gilles, Stéphanie Marchesseau, Hugo Talbot, Hadrien Courtecuisse, Guillaume Bousquet, Igor Peterlik, et al. Sofa: A multi-model framework for interactive physical simulation. *Soft tissue biomechanical modeling for computer assisted surgery*, pages 283–321, 2012.
- [10] Ian J Goodfellow, Jean Pouget-Abadie, Mehdi Mirza, Bing Xu, David Warde-Farley, Sherjil Ozair, Aaron Courville, and Yoshua Bengio. Generative adversarial nets. *Advances in neural information processing systems*, 27, 2014.
- [11] Hannes Hase, Mohammad Farid Azampour, Maria Tirindelli, Magdalini Paschali, Walter Simson, Emad Fatemizadeh, and Nassir Navab. Ultrasound-guided robotic navigation with deep reinforcement learning. In *2020 IEEE/RSJ International Conference on Intelligent Robots and Systems (IROS)*, pages 5534–5541. IEEE, 2020.
- [12] Jonathan Ho, Ajay Jain, and Pieter Abbeel. Denoising diffusion probabilistic models. *Advances in neural information processing systems*, 33:6840–6851, 2020.
- [13] Phillip Isola, Jun-Yan Zhu, Tinghui Zhou, and Alexei A Efros. Image-to-image translation with conditional adversarial networks. In *Proceedings of the IEEE conference on computer vision and pattern recognition*, pages 1125–1134, 2017.
- [14] Zahra Izadifar, Paul Babyn, and Dean Chapman. Mechanical and biological effects of ultrasound: a review of present knowledge. *Ultrasound in medicine & biology*, 43(6):1085–1104, 2017.
- [15] Zhongliang Jiang, Septimiu E Salcudean, and Nassir Navab. Robotic ultrasound imaging: State-of-the-art and future perspectives. *Medical image analysis*, 89:102878, 2023.

- [16] Dmitry Kalashnikov, Alex Irpan, Peter Pastor, Julian Ibarz, Alexander Herzog, Eric Jang, Deirdre Quillen, Ethan Holly, Mrinal Kalakrishnan, Vincent Vanhoucke, et al. Scalable deep reinforcement learning for vision-based robotic manipulation. In *Conference on robot learning*, pages 651–673. PMLR, 2018.
- [17] Sofoklis Katakis, Nikolaos Barotsis, Alexandros Kakotaritis, Panagiotis Tsiganos, George Economou, Elias Panagiotopoulos, and George Panayiotakis. Generation of musculoskeletal ultrasound images with diffusion models. *BioMedInformatics*, 3(2):405–421, 2023.
- [18] Oliver Kutter, Ramtin Shams, and Nassir Navab. Visualization and gpu-accelerated simulation of medical ultrasound from ct images. *Computer methods and programs in biomedicine*, 94(3):250–266, 2009.
- [19] Ang Li, Jiayi Han, Yongjian Zhao, Keyu Li, and Li Liu. Realistic ultrasound synthesis based on diagnostic ct to facilitate ultrasound-guided robotic spine surgery. *IEEE Transactions on Medical Robotics and Bionics*, 5(4):879–889, 2023.
- [20] Keyu Li, Jian Wang, Yangxin Xu, Hao Qin, Dongsheng Liu, Li Liu, and Max Q-H Meng. Autonomous navigation of an ultrasound probe towards standard scan planes with deep reinforcement learning. In *2021 IEEE International Conference on Robotics and Automation (ICRA)*, pages 8302–8308. IEEE, 2021.
- [21] Ruixuan Li, Ayoob Davoodi, Yuyu Cai, Kenan Niu, Gianni Borghesan, Nicola Cavalcanti, Aidana Massalimova, Fabio Carrillo, Christoph J Laux, Mazda Farshad, et al. Robot-assisted ultrasound reconstruction for spine surgery: from bench-top to pre-clinical study. *International journal of computer assisted radiology and surgery*, 18(9):1613–1623, 2023.
- [22] Ruixuan Li, Ayoob Davoodi, Maikel Timmermans, Kaat Van Assche, Orçun Taylan, Lennart Scheys, Matthias Tummers, Gianni Borghesan, and Emmanuel Vander Poorten. Ultrasound-based robot-assisted drilling for minimally invasive pedicle screw placement. *IEEE Transactions on Medical Robotics and Bionics*, 6(3):818–828, 2024.
- [23] Jiamin Liang, Xin Yang, Yuhao Huang, Haoming Li, Shuangchi He, Xindi Hu, Zejian Chen, Wufeng Xue, Jun Cheng, and Dong Ni. Sketch guided and progressive growing gan for realistic and editable ultrasound image synthesis. *Medical image analysis*, 79:102461, 2022.
- [24] Yonghao Long, Wang Wei, Tao Huang, Yuehao Wang, and Qi Dou. Human-in-the-loop embodied intelligence with interactive simulation environment for surgical robot learning. *IEEE Robotics and Automation Letters*, 8(8):4441–4448, 2023.
- [25] Viktor Makoviychuk, Lukasz Wawrzyniak, Yunrong Guo, Michelle Lu, Kier Storey, Miles Macklin, David Hoeller, Nikita Rudin, Arthur Allshire, Ankur Handa, et al. Isaac gym: High performance gpu-based physics simulation for robot learning. *arXiv preprint arXiv:2108.10470*, 2021.
- [26] Oliver Mattausch, Maxim Makhinya, and Orcun Goksel. Realistic ultrasound simulation of complex surface models using interactive monte-carlo path tracing. In *Computer Graphics Forum*, volume 37, pages 202–213. Wiley Online Library, 2018.
- [27] Takahiro Miki, Joonho Lee, Jemin Hwangbo, Lorenz Wellhausen, Vladlen Koltun, and Marco Hutter. Learning robust perceptive locomotion for quadrupedal robots in the wild. *Science robotics*, 7(62):eabk2822, 2022.
- [28] Mayank Mittal, Calvin Yu, Qinxu Yu, Jingzhou Liu, Nikita Rudin, David Hoeller, Jia Lin Yuan, Ritvik Singh, Yunrong Guo, Hammad Mazhar, Ajay Mandlekar, Buck Babich, Gavriel State, Marco Hutter, and Animesh Garg. Orbit: A unified simulation framework for interactive robot learning environments. *IEEE Robotics and Automation Letters*, 8(6):3740–3747, 2023.
- [29] Volodymyr Mnih, Adria Puigdomenech Badia, Mehdi Mirza, Alex Graves, Timothy Lillicrap, Tim Harley, David Silver, and Koray Kavukcuoglu. Asynchronous methods for deep reinforcement learning. In *International conference on machine learning*, pages 1928–1937. PmLR, 2016.



- [30] Masoud Moghani, Nigel Nelson, Mohamed Ghanem, Andres Diaz-Pinto, Kush Hari, Mahdi Azizian, Ken Goldberg, Sean Huver, and Animesh Garg. Sufia-bc: Generating high quality demonstration data for visuomotor policy learning in surgical subtasks. *arXiv preprint arXiv:2504.14857*, 2025.
- [31] Andres Diaz-Pinto Mostafa Toloui and Masoud Moghani. Introducing nvidia isaac for healthcare, an ai-powered medical robotics development platform, 2025. Available at <https://developer.nvidia.com/blog/introducing-nvidia-isaac-for-healthcare-an-ai-powered-medical-robotics-development-platform/> (Accessed: 2025-05-07).
- [32] Guochen Ning, Xinran Zhang, and Hongen Liao. Autonomic robotic ultrasound imaging system based on reinforcement learning. *IEEE transactions on biomedical engineering*, 68(9):2787–2797, 2021.
- [33] Prashant Pandey, Pierre Guy, Antony J Hodgson, and Rafeef Abugharbieh. Fast and automatic bone segmentation and registration of 3d ultrasound to ct for the full pelvic anatomy: a comparative study. *International journal of computer assisted radiology and surgery*, 13:1515–1524, 2018.
- [34] Matteo Pavone, Barbara Seeliger, Elena Teodorico, Marta Goglia, Cristina Taliento, Nicolò Bizzarri, Lise Lecointre, Cherif Akladios, Antonello Forgione, Giovanni Scambia, et al. Ultrasound-guided robotic surgical procedures: a systematic review. *Surgical endoscopy*, 38(5):2359–2370, 2024.
- [35] Manish Prajapat, Mojmir Mutny, Melanie Zeilinger, and Andreas Krause. Submodular reinforcement learning. In *The Twelfth International Conference on Learning Representations*, 2024.
- [36] Mehrdad Salehi, Seyed-Ahmad Ahmadi, Raphael Prevost, Nassir Navab, and Wolfgang Wein. Patient-specific 3d ultrasound simulation based on convolutional ray-tracing and appearance optimization. In *Medical Image Computing and Computer-Assisted Intervention–MICCAI 2015: 18th International Conference, Munich, Germany, October 5-9, 2015, Proceedings, Part II 18*, pages 510–518. Springer, 2015.
- [37] Paul Maria Scheikl, Balázs Gyenes, Rayan Younis, Christoph Haas, Gerhard Neumann, Martin Wagner, and Franziska Mathis-Ullrich. Lapgym-an open source framework for reinforcement learning in robot-assisted laparoscopic surgery. *Journal of Machine Learning Research*, 24(368):1–42, 2023.
- [38] Samuel Schmidgall, Axel Krieger, and Jason Eshraghian. Surgical gym: A high-performance gpu-based platform for reinforcement learning with surgical robots. *arXiv preprint arXiv:2310.04676*, 2023.
- [39] John Schulman, Filip Wolski, Prafulla Dhariwal, Alec Radford, and Oleg Klimov. Proximal policy optimization algorithms, 2017.
- [40] Antonio Serrano-Muñoz, Dimitrios Chrysostomou, Simon Bøgh, and Nestor Arana-Arexolaleiba. skrl: Modular and flexible library for reinforcement learning. *Journal of Machine Learning Research*, 24(254):1–9, 2023.
- [41] Ramtin Shams, Richard Hartley, and Nassir Navab. Real-time simulation of medical ultrasound from ct images. In *Medical Image Computing and Computer-Assisted Intervention–MICCAI 2008: 11th International Conference, New York, NY, USA, September 6-10, 2008, Proceedings, Part II 11*, pages 734–741. Springer, 2008.
- [42] Kihyuk Sohn, Honglak Lee, and Xinchen Yan. Learning structured output representation using deep conditional generative models. *Advances in neural information processing systems*, 28, 2015.
- [43] Yuhan Song and Nak Young Chong. S-cyclegan: Semantic segmentation enhanced ct-ultrasound image-to-image translation for robotic ultrasonography. In *2024 IEEE International Conference on Cyborg and Bionic Systems (CBS)*, pages 115–120. IEEE, 2024.

- [44] David Stojanovski, Uxio Hermida, Pablo Lamata, Arian Beqiri, and Alberto Gomez. Echo from noise: synthetic ultrasound image generation using diffusion models for real image segmentation. In *International Workshop on Advances in Simplifying Medical Ultrasound*, pages 34–43. Springer, 2023.
- [45] Emanuel Todorov, Tom Erez, and Yuval Tassa. Mujoco: A physics engine for model-based control. In *2012 IEEE/RSJ international conference on intelligent robots and systems*, pages 5026–5033. IEEE, 2012.
- [46] Kaat Van Assche, Ruixuan Li, Ayoob Davoodi, Matthias Tummers, Mouloud Ourak, Gianni Borghesan, Nicola Cavalcanti, Philipp Fünstahl, and Emmanuel Vander Poorten. Robotic path re-planning for us reconstruction of the spine. *IEEE Transactions on Medical Robotics and Bionics*, 2025.
- [47] Ashish Vaswani, Noam Shazeer, Niki Parmar, Jakob Uszkoreit, Llion Jones, Aidan N Gomez, Lukasz Kaiser, and Illia Polosukhin. Attention is all you need. *Advances in neural information processing systems*, 30, 2017.
- [48] Maria Victorova, Michael Ka-Shing Lee, David Navarro-Alarcon, and Yongping Zheng. Follow the curve: Robotic ultrasound navigation with learning-based localization of spinous processes for scoliosis assessment. *IEEE access*, 10:40216–40229, 2022.
- [49] Jakob Wasserthal, Hanns-Christian Breit, Manfred T Meyer, Maurice Pradella, Daniel Hinck, Alexander W Sauter, Tobias Heye, Daniel T Boll, Joshy Cyriac, Shan Yang, et al. Totalsegmentator: robust segmentation of 104 anatomic structures in ct images. *Radiology: Artificial Intelligence*, 5(5):e230024, 2023.
- [50] Luohong Wu, Nicola A Cavalcanti, Matthias Seibold, Giuseppe Loggia, Lisa Reissner, Jonas Hein, Silvan Beeler, Arnd Viehöfer, Stephan Wirth, Lilian Calvet, et al. Ultrabones100k: A reliable automated labeling method and large-scale dataset for ultrasound-based bone surface extraction. *arXiv preprint arXiv:2502.03783*, 2025.
- [51] Jiaqi Xu, Bin Li, Bo Lu, Yun-Hui Liu, Qi Dou, and Pheng-Ann Heng. Surrol: An open-source reinforcement learning centered and dvrk compatible platform for surgical robot learning. In *2021 IEEE/RSJ International Conference on Intelligent Robots and Systems (IROS)*, pages 1821–1828. IEEE, 2021.
- [52] Qinxi Yu, Masoud Moghani, Karthik Dharmarajan, Vincent Schorp, William Chung-Ho Panitch, Jingzhou Liu, Kush Hari, Huang Huang, Mayank Mittal, Ken Goldberg, et al. Orbit-surgical: An open-simulation framework for learning surgical augmented dexterity. In *2024 IEEE International Conference on Robotics and Automation (ICRA)*, pages 15509–15516. IEEE, 2024.
- [53] Tony Z Zhao, Vikash Kumar, Sergey Levine, and Chelsea Finn. Learning fine-grained bimanual manipulation with low-cost hardware. *arXiv preprint arXiv:2304.13705*, 2023.
- [54] Weiye Zhao, Rui Chen, Yifan Sun, Tianhao Wei, and Changliu Liu. State-wise constrained policy optimization, 2024.
- [55] Jun-Yan Zhu, Taesung Park, Phillip Isola, and Alexei A Efros. Unpaired image-to-image translation using cycle-consistent adversarial networks. In *Proceedings of the IEEE international conference on computer vision*, pages 2223–2232, 2017.

## A Dataset access

Below are the links to our project website, source code, simulation assets, and expert dataset.

**Project website:** <https://sonogym.github.io/>.

**Code:** <https://github.com/SonoGym/SonoGym>.

**Simulation assets:** [https://huggingface.co/datasets/yunkao/SonoGym\\_assets\\_models](https://huggingface.co/datasets/yunkao/SonoGym_assets_models).

**Expert dataset:** [https://huggingface.co/datasets/yunkao/SonoGym\\_lerobot\\_dataset](https://huggingface.co/datasets/yunkao/SonoGym_lerobot_dataset)

## B Simulation details

### B.1 Assets

We provide both the KUKA Med14 and Franka Emika Panda robot arms for ultrasound probe manipulation. To generate joint-space commands for robot control, we employ differential inverse kinematics controllers from IsaacLab. For the patient dataset, we process 3D CT images and corresponding label maps from 10 subjects in the TotalSegmentator dataset, capturing anatomical variability as illustrated in Fig. 9. Each patient’s torso is converted into an STL mesh to enable physical interaction with the robot arms and patient beds in IsaacLab simulation environments. These torso models are treated as rigid bodies and are spatially aligned with their respective CT volumes and label maps. For each patient, we define the surgical target pose at the L4 vertebra using our in-house planning software, which incorporates clinical requirements for pedicle screw insertion trajectories.

### B.2 Ultrasound simulation

**Model-based approach** We follow the ray-tracing-based model introduced in [36] for ultrasound simulation. The ultrasound image  $I \in \mathbb{R}^{H \times W}$  consists of a reflection component  $R \in \mathbb{R}^{H \times W}$  and a backscattered component  $B \in \mathbb{R}^{H \times W}$ :  $I = R + B$ . For each 2D pixel position  $u := (x, y)$ , where  $x \in [0, W)$  and  $y \in [0, H)$ , the reflection term  $R$  is computed as:

$$R(u) = |E(u) \cdot \cos \Theta(u) \cdot \frac{Z(x, y + \delta y) - Z(x, y)}{Z(x, y + \delta y) + Z(x, y)}| \cdot P(u) \otimes G(u)$$

where  $E(u)$  is the remaining energy at  $u$ ,  $\Theta(u)$  is the incidence angle of the ray (along the  $+y$  direction) at the medium boundary surface,  $Z(x, y)$  denotes the acoustic impedance of the tissue,  $\delta y$  is the vertical image resolution,  $P(u)$  is the point spread function (PSF),  $G(u)$  is the indicator function for surface boundaries, and  $\otimes$  denotes convolution. The remaining energy  $E(u)$  is computed based on the attenuation coefficients  $\alpha$  of the tissue at each position:

$$E(u) = E_0 \exp \left( -f \cdot \int_0^y \alpha(x, v) dv \right),$$

where  $f$  is the ultrasound frequency and  $E_0$  is the initial energy. The acoustic impedance  $Z(u)$  is set proportional to the CT intensity, following [18]. The attenuation map  $\alpha$  is determined based on the ultrasound simulation settings from Imfusion Suite [36]<sup>2</sup>. The PSF is modeled with a 2D Gaussian kernel with variances approximately 1% of the image size.  $G$  and  $\Theta$  are obtained from the 2D label slice.

The backscattering term  $B$  is computed as:

$$B(u) = E(u) \cdot P(u) \otimes T(u)$$

where  $T(u)$  represents the scattering pattern.  $T(u)$  is determined using three tissue parameters  $\sigma_0$ ,  $\mu_0$ , and  $\mu_1$ , along with two Gaussian noise maps  $N_0$  and  $N_1$ :

$$\begin{aligned} \tilde{T}(u) &= N_0(u) \cdot \sigma_0(u) + \mu_0(u) \\ T(u) &= \begin{cases} \tilde{T}(u), & N_1(u) \leq \mu_1(u) \\ 0, & \text{otherwise} \end{cases} \end{aligned}$$

<sup>2</sup><https://www.imfusion.com/>

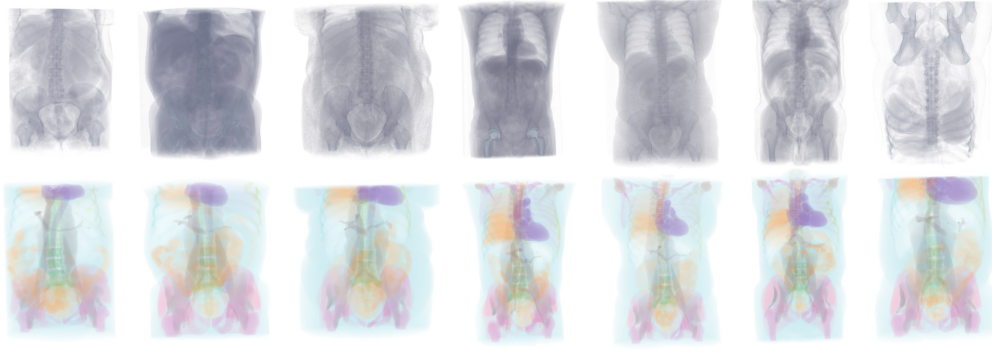

Figure 9: **Patient anatomy data from TotalSegmentator dataset.** We provide ultrasound simulation based on diverse real patient models, including CT volume and segmentation.

565 The noise maps  $N_0$  and  $N_1$  are sampled over the 3D space at initialization and remain fixed throughout  
 566 the online simulation.  $\sigma_0$ ,  $\mu_0$ , and  $\mu_1$  of each tissue are determined based on settings in Imfuser. To  
 567 capture spatial scattering variations at larger scales, we additionally incorporate multi-scale versions  
 568 of  $N_0$  and  $N_1$ , following the approach introduced in [26].

569 **Learning-based approach** We follow the setup described in [50] to collect a dataset of paired CT-US  
 570 images from seven ex-vivo spine specimens. Optical markers are attached to the sacrum of each  
 571 specimen, and additional K-wires (2.5 mm in diameter, 150 mm in length; DePuy Synthes, USA)  
 572 are used to stabilize each vertebra, avoiding bone movement during data acquisition. CT scans were  
 573 acquired for each specimen with an image resolution of  $512 \times 512$  pixels, an in-plane pixel spacing of  
 574  $0.839 \text{ mm} \times 0.839 \text{ mm}$ , and a slice thickness of 0.6 mm (NAEOTOM Alpha, Siemens, Germany). For  
 575 ultrasound imaging, we used the Aixplorer Ultimate system (SuperSonic Imagine, Aix-en-Provence,  
 576 France) equipped with an SL18-5 linear probe (SuperSonic Imagine, Aix-en-Provence, France). An  
 577 optical marker was attached to the ultrasound probe for pose tracking using an optical tracking system  
 578 (FusionTrack 500, Atracsys, Switzerland). We follow the calibration pipeline in [50] to calibrate the  
 579 ultrasound probe. Based on tracking data from both the spine specimen and the ultrasound probe, we  
 580 register the CT and US volumes, enabling the generation of paired CT-US images.

581 Our pix2pix network adopts the deep U-Net architecture illustrated in Fig. 11. The model is trained  
 582 using a combination of L1 loss and GAN loss, with respective weights of 1 and 0.01. In total, we train  
 583 five separate networks for 15–25 epochs on our training dataset. To improve generalization to unseen  
 584 CT resolutions (such as those encountered in our simulation data), we apply data augmentation via  
 585 random downsampling and upsampling.

## 586 C Environments details

### 587 C.1 Task 1: Ultrasound navigation

588 **Environment settings** The initial 2D pose of the ultra-  
 589 sound probe is randomized within a  $130 \times 130 \text{ [mm}^2\text{]}$   
 590 region on the frontal plane of the patient, like the region  
 591 shown in Fig. 10. The orientation of the probe is initialized  
 592 with a rotation between 1.5 and 3.5 [rad] from the trans-  
 593 verse plane. We set the ultrasound image size to  $200 \times 150$   
 594 pixels, with a spatial resolution of 0.5 [mm] per pixel. For  
 595 the reward function, we assign a weight of  $w_1 = 0.045$  to  
 596 balance the position error (in [mm]) and rotation error (in  
 597 [rad]).

598 **Agents** The network architecture used for the PPO and  
 599 A2C agents is shown in Fig.12, comprising 4 convolutional  
 600 layers followed by 3 fully connected layers. The agents  
 601 are provided by the SKRL [40] library, which supports

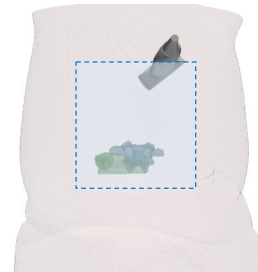

Figure 10: **Top-down view of region of manipulating the probe.**

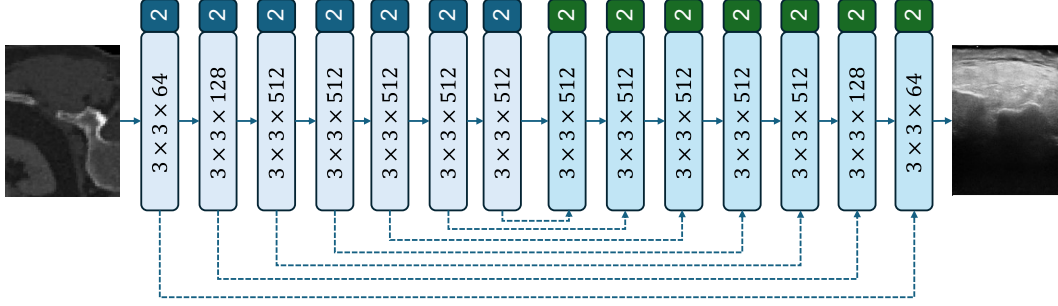

Figure 11: **U-Net architecture used for learning-based ultrasound simulation.** Dashed lines indicate residual connections within the U-Net. Convolutional (blue) and transposed convolutional (cyan) layers are annotated with (kernel size) $\times$ (kernel size) $\times$ (number of channels). The values in the blue and green blocks denote the stride used for downsampling and upsampling, respectively.

the KLAdaptiveLR scheduler for the PPO agent. The hyperparameters used for training are listed in Tab.2 and Tab.3. Training is performed with 128 parallel environments, each with an episode length of 300 steps. For imitation learning, we construct expert datasets using our expert policy from three settings:

- model-based ultrasound simulation with a single patient (MB),
- learning-based simulation with a single patient (LB),
- learning-based simulation using four distinct simulation networks (LB 4 net).

The number of episodes in each dataset is 2052, 1869, and 954, respectively, as summarized in Tab. 4.

## C.2 Task 2: Bone surface reconstruction

**Environment settings** The observation volume has a shape of  $40 \times 40 \times 40$  voxels with a voxel resolution of 3 [mm]. At each time step, a new 2D ultrasound image is received from the probe, and we assume that a segmentation of the bone surface is available from this image. This segmentation is simulated from the ground truth bone surface by independently applying a missing probability of 20% to each ground truth surface point. The resulting 2D segmentation map is then used to update the 3D surface reconstruction based on the current pose of the ultrasound probe. The initial 2D position of the ultrasound probe in the patient’s frontal plane is randomized within a  $30 \times 30$  [mm<sup>2</sup>] region centered around the target vertebra position. For reward design, we use weights  $w_2 = 0.01$  and  $w_3 = 1$  to balance the amount of surface coverage with the total trajectory length and rotation angle.

**Agents** The network architecture of the PPO and A2C agents is illustrated in Fig.12, which contains 3 convolutional layers and 3 fully-connected layers. The hyperparameters are shown in Tab. 2 and Tab. 3. The agents are trained with 128 parallel environments with episode length 300.

Table 2: Hyperparameters of PPO agent.

| Hyperparameters          | <i>navigation</i> | <i>reconstruction</i> | <i>surgery</i> |
|--------------------------|-------------------|-----------------------|----------------|
| rollouts                 | 32                | 32                    | 16             |
| learning_epochs          | 5                 | 3                     | 3              |
| mini_batches             | 32                | 4                     | 32             |
| discount_factor          | 0.99              | 0.99                  | 0.99           |
| lambda                   | 0.95              | 0.95                  | 0.95           |
| learning_rate            | 0.0001            | 0.0003                | 0.0001         |
| learning_rate_scheduler: | KLAdaptiveLR      | KLAdaptiveLR          | KLAdaptiveLR   |
| kl_threshold: 0.008      | 0.008             | 0.008                 | 0.008          |
| grad_norm_clip           | 1                 | 1                     | 1              |
| ratio_clip               | 0.2               | 0.2                   | 0.2            |
| value_clip               | 0.2               | 0.1                   | 0.1            |
| value_loss_scale         | 1                 | 1                     | 1              |

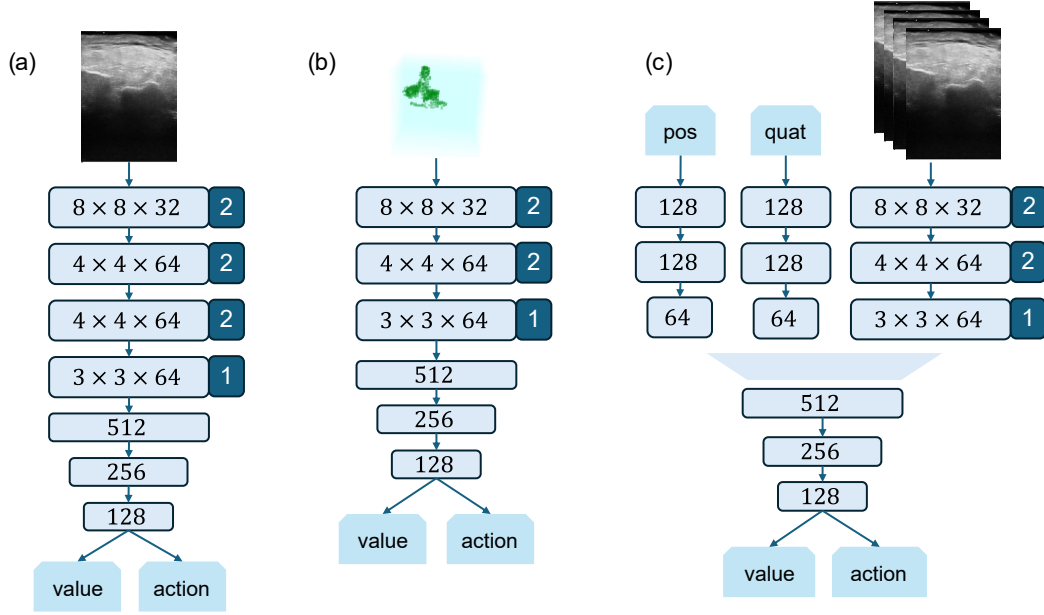

Figure 12: **Network architecture** for (a) *navigation*, (b) *reconstruction* and (c) *surgery*. The convolution layers are represented by (kernel size) $\times$ (kernel size) $\times$ (number of channels). The numbers in the blue block on the right is the numbers of strides.

Table 3: Hyperparameters of A2C agents.

| Hyperparameters | <i>navigation</i> | <i>reconstruction</i> | <i>surgery</i> |
|-----------------|-------------------|-----------------------|----------------|
| rollouts        | 16                | 64                    | 64             |
| learning_epochs | 5                 | 3                     | 1              |
| mini_batches    | 32                | 32                    | 4              |
| discount_factor | 0.99              | 0.99                  | 0.99           |
| lambda          | 0.95              | 0.95                  | 0.95           |
| learning_rate   | 0.0001            | 0.0001                | 0.0001         |
| grad_norm_clip  | 1                 | 1                     | 1              |

Table 4: Number of episodes for expert datasets.

| Settings      | <i>navigation</i> | <i>surgery</i> |
|---------------|-------------------|----------------|
| MB            | 2052              | 3536           |
| MB 5 patients | -                 | 1476           |
| LB            | 1869              | 2052           |
| LB 4 net      | 954               | 2692           |

### 623 C.3 Task 3: Ultrasound-guided surgery

624 **Environment settings** The size of 3D ultrasound volume for the *surgery* task is  $50 \times 37 \times 5$ , with  
625 resolutions  $2 \times 2 \times 10$  [mm<sup>3</sup>] along height, width, and elevation, respectively. The initial joint angles of  
626 the drill robot are randomized within  $[-1.5 \pm 0.2, -0.2 \pm 0.1, 0.0 \pm 0.1, -1.3 \pm 0.1, 0.0 \pm 0.1, 1.8 \pm$   
627  $0.1, 0.0 \pm 0.1]^T$  [rad]. The starting point of the trajectory on the skin is defined as  $p_l = [0, 0, -50]$  [mm]  
628 in the goal frame  $\{G\}$ . The position of the ultrasound probe above the target vertebra is set above  
629 the center of the vertebra with 30 [mm] translation to the ultrasound robot side. This position is  
630 further randomized within a range of 5 [mm] along all tangential axes. The reward weights are set as  
631  $w_4 = 30$ ,  $w_5 = 5$ , and  $w_6 = 300$  to encourage the agent to minimize the *side error* during insertion.

632 **Agents** The network architecture of the PPO and A2C agents is illustrated in Fig. 12. It consists of  
633 three convolutional layers for encoding image features, three fully connected layers for encoding  
634 positional information, and three fully connected layers for encoding quaternion representations.

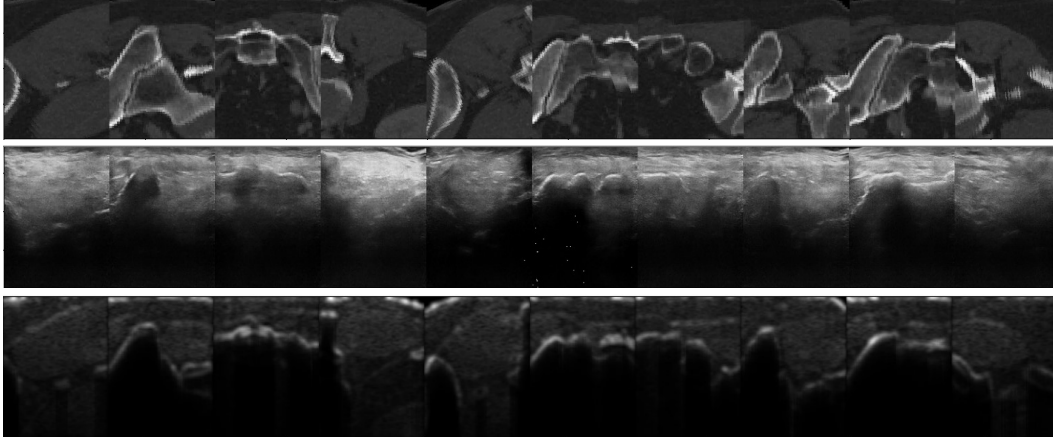

Figure 13: **Additional qualitative results of ultrasound simulation.** The top, middle, and down rows are CT slices, learning-based ultrasound simulation and model-based ultrasound simulation, respectively.

These feature streams are then concatenated and processed by an additional three fully connected layers. The training hyperparameters are summarized in Tab.2 and Tab.3. The agents are trained with 128 parallel environments with episode length of 600 steps. For the expert dataset for imitation learning, we provide datasets collected from four different settings:

- model-based ultrasound simulation from a single patient (MB),
- model-based ultrasound simulation from 5 patients (MB 5 patients),
- learning-based simulation from a single patient (LB),
- learning-based simulation with 4 simulation networks (LB 4 net).

The corresponding numbers of episodes are 3536, 1476, 2052, and 2692, respectively, as shown in Tab. 4. To increase dataset variability, we expand the range of initial robot joint angles as  $[-1.6 \pm 0.3, -0.0 \pm 0.25, 0.0 \pm 0.2, -1.3 \pm 0.2, 0.0 \pm 0.2, 1.8 \pm 0.2, 0.0 \pm 0.1]^T$  [rad], enabling the drill to start from configurations that may fall within unsafe regions.

## D Additional results

### D.1 Ultrasound simulation

We provide additional examples of learning-based ultrasound simulation for qualitative evaluation. Fig. 13 presents more comparisons between CT slice, model-based and learning-based ultrasound simulations. In CT slices where bone structures exhibit low contrast relative to surrounding tissues, the network occasionally struggles to generate clear bone surfaces and corresponding shadows in the ultrasound images. Although bone surfaces are clearly rendered in many cases, the bone shadows sometimes appear insufficiently dark beneath certain surfaces. We also analyze the variability across different generative networks when given the same CT slice input, as illustrated in Fig. 14. Despite all networks being trained on the identical dataset, different random seeds lead to diverse ultrasound texture patterns. This enables improved image-domain generalization of the agents by randomly sampling from multiple simulation networks during training.

### D.2 Reinforcement learning and imitation learning

**How effectively do learned and heuristic policies cover the surface?** A comparison of reconstructed surfaces between the learned and heuristic policies is shown in Fig. 15. The learned policy demonstrates greater surface coverage, particularly from the back and side views. This improvement may stem from the DRL agents learning to adjust the probe’s pitch, allowing them to capture more points on surface regions where the normals are not oriented vertically.



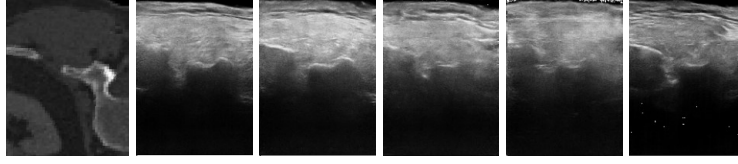

Figure 14: **Variation between ultrasound simulation models.** The input CT slice is shown left, and the other 5 ultrasound images are generated from different models with the same CT input.

Table 5: Side errors, insertion errors and rotation errors achieved by different approaches in the *surgery* task, with standard deviations included (in contrast to Tab. 1).

| US sim | Algos    | side err ↓[mm]    |                    | insert err ↓[mm]  |                   | rot err ↓[deg]    |                   |
|--------|----------|-------------------|--------------------|-------------------|-------------------|-------------------|-------------------|
|        |          | IDT               | ODT                | IDT               | ODT               | IDT               | ODT               |
| MB     | PPO      | 2.32 ± 1.3        | <b>5.66</b> ± 18.5 | 16.0 ± 5.5        | 20.5 ± 8.0        | 5.11 ± 1.6        | 4.54 ± 4.4        |
|        | PPO + SF | <b>2.17</b> ± 1.2 | 8.94 ± 6.1         | 13.9 ± 3.3        | 27.3 ± 5.6        | 5.36 ± 2.2        | <b>4.55</b> ± 2.5 |
|        | ACT      | 5.38 ± 2.7        | 18.4 ± 9.8         | <b>2.92</b> ± 1.1 | <b>14.5</b> ± 4.7 | <b>0.62</b> ± 0.8 | 5.98 ± 2.7        |
| LB     | PPO      | 5.42 ± 4.9        | 6.41 ± 2.6         | 12.3 ± 3.2        | 26.9 ± 4.7        | 3.7 ± 1.6         | 3.76 ± 2.5        |
|        | PPO + SF | <b>5.07</b> ± 5.5 | <b>4.56</b> ± 7.0  | 11.9 ± 7.5        | 27.2 ± 4.1        | 3.93 ± 2.5        | 3.59 ± 1.8        |
|        | ACT      | 5.34 ± 3.0        | 6.26 ± 2.6         | <b>1.62</b> ± 0.9 | <b>1.72</b> ± 1.4 | <b>1.01</b> ± 1.0 | <b>1.81</b> ± 1.1 |

665 **How well do agents generalize to a new patient with learning-based ultrasound simulation?** As  
666 shown in Tab.6, the performance on a previously unseen patient remains significantly lower compared  
667 to the results in Tab.5. This highlights the challenge of achieving generalization across anatomical  
668 variations when training with a limited number of patient examples.

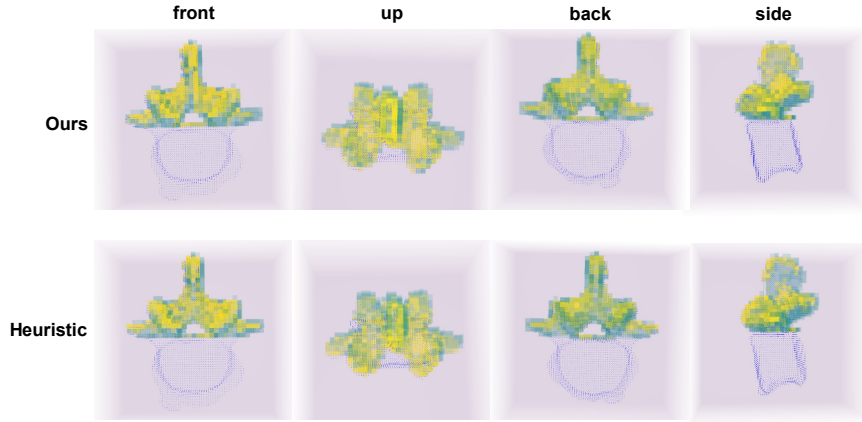

Figure 15: **Reconstructed surfaces.** The reconstructed points and uncovered points on the bone surface are colored yellow and green, respectively. The DRL policy obviously has higher coverage from the back and side views.

669 **What about other agents?** We also trained Soft Actor-Critic (SAC) agents for both the *navigation*  
670 and *surgery* tasks, but were unable to obtain high-performing policies. We adopted the same network  
671 architecture as in our PPO/A2C experiments, but without sharing the encoder between the policy  
672 and value networks. Our hyperparameter search covered the following ranges: actor learning rate  
673 (0.00001, 0.0001, 0.001), critic learning rate (0.00001, 0.0001, 0.001), gradient steps (1, 8, 32), and  
674 batch size (64, 256). We set the replay buffer size to 64,000, taking into account the high memory  
675 usage of image observations.

676 For the *surgery* task, we additionally trained PPO-Lagrangian agents using the following hyperparam-  
677 eter search ranges: learning rates 0.0001 with KLAadaptiveLR scheduler, number of rollouts (16, 32,  
678 64), number of mini-batches (4, 32, 128), number of learning epochs (1, 3, 5), and value loss scale  
679 (1.0, 3.0, 10.0). However, none of these configurations resulted in consistently successful policies.

Table 6: Performance of different approaches on a new patient for the *surgery* task with learning-based ultrasound simulation

| Algos    | side err [mm]   | insert err [mm] | rot err [deg]   | safe ratio [%] |
|----------|-----------------|-----------------|-----------------|----------------|
| PPO      | 27.3 $\pm$ 36.4 | 12.1 $\pm$ 8.77 | 8.28 $\pm$ 7.33 | 52.86          |
| PPO + SF | 17.6 $\pm$ 54.2 | 11.2 $\pm$ 7.48 | 8.02 $\pm$ 7.12 | 60.08          |
| ACT      | 20.7 $\pm$ 15.6 | 15.4 $\pm$ 3.92 | 7.64 $\pm$ 2.85 | 72.06          |

680 While Decision Transformer (DP) achieved promising results for the *navigation* task, it failed to  
681 perform well on the *surgery* task using the default settings. We experimented with varying the number  
682 of historical observation steps (1, 2), action steps (4, 8), planning horizons (8, 16), and learning rates  
683 (0.00001, 0.0001), but these adjustments did not lead to significant performance improvements.

## NeurIPS Paper Checklist

### 1. Claims

Question: Do the main claims made in the abstract and introduction accurately reflect the paper's contributions and scope?

Answer: [\[Yes\]](#)

Justification: The main claims are shown in SonoGym Envrionments Section and Experiment section

Guidelines:

- The answer NA means that the abstract and introduction do not include the claims made in the paper.
- The abstract and/or introduction should clearly state the claims made, including the contributions made in the paper and important assumptions and limitations. A No or NA answer to this question will not be perceived well by the reviewers.
- The claims made should match theoretical and experimental results, and reflect how much the results can be expected to generalize to other settings.
- It is fine to include aspirational goals as motivation as long as it is clear that these goals are not attained by the paper.

### 2. Limitations

Question: Does the paper discuss the limitations of the work performed by the authors?

Answer: [\[Yes\]](#)

Justification: We discuss the limitation in the Conclusion section.

Guidelines:

- The answer NA means that the paper has no limitation while the answer No means that the paper has limitations, but those are not discussed in the paper.
- The authors are encouraged to create a separate "Limitations" section in their paper.
- The paper should point out any strong assumptions and how robust the results are to violations of these assumptions (e.g., independence assumptions, noiseless settings, model well-specification, asymptotic approximations only holding locally). The authors should reflect on how these assumptions might be violated in practice and what the implications would be.
- The authors should reflect on the scope of the claims made, e.g., if the approach was only tested on a few datasets or with a few runs. In general, empirical results often depend on implicit assumptions, which should be articulated.
- The authors should reflect on the factors that influence the performance of the approach. For example, a facial recognition algorithm may perform poorly when image resolution is low or images are taken in low lighting. Or a speech-to-text system might not be used reliably to provide closed captions for online lectures because it fails to handle technical jargon.
- The authors should discuss the computational efficiency of the proposed algorithms and how they scale with dataset size.
- If applicable, the authors should discuss possible limitations of their approach to address problems of privacy and fairness.
- While the authors might fear that complete honesty about limitations might be used by reviewers as grounds for rejection, a worse outcome might be that reviewers discover limitations that aren't acknowledged in the paper. The authors should use their best judgment and recognize that individual actions in favor of transparency play an important role in developing norms that preserve the integrity of the community. Reviewers will be specifically instructed to not penalize honesty concerning limitations.

### 3. Theory assumptions and proofs

Question: For each theoretical result, does the paper provide the full set of assumptions and a complete (and correct) proof?

Answer: [\[NA\]](#)

Justification: We do not provide new theoretical results in this paper.

Guidelines:

- The answer NA means that the paper does not include theoretical results.
- All the theorems, formulas, and proofs in the paper should be numbered and cross-referenced.
- All assumptions should be clearly stated or referenced in the statement of any theorems.
- The proofs can either appear in the main paper or the supplemental material, but if they appear in the supplemental material, the authors are encouraged to provide a short proof sketch to provide intuition.
- Inversely, any informal proof provided in the core of the paper should be complemented by formal proofs provided in appendix or supplemental material.
- Theorems and Lemmas that the proof relies upon should be properly referenced.

#### 4. Experimental result reproducibility

Question: Does the paper fully disclose all the information needed to reproduce the main experimental results of the paper to the extent that it affects the main claims and/or conclusions of the paper (regardless of whether the code and data are provided or not)?

Answer: [\[Yes\]](#)

Justification: We provide the necessary details to reproduce our results in the SonoGym Environment Sections, Experiments, and attached codes. Further details are also provided in the appendix.

Guidelines:

- The answer NA means that the paper does not include experiments.
- If the paper includes experiments, a No answer to this question will not be perceived well by the reviewers: Making the paper reproducible is important, regardless of whether the code and data are provided or not.
- If the contribution is a dataset and/or model, the authors should describe the steps taken to make their results reproducible or verifiable.
- Depending on the contribution, reproducibility can be accomplished in various ways. For example, if the contribution is a novel architecture, describing the architecture fully might suffice, or if the contribution is a specific model and empirical evaluation, it may be necessary to either make it possible for others to replicate the model with the same dataset, or provide access to the model. In general, releasing code and data is often one good way to accomplish this, but reproducibility can also be provided via detailed instructions for how to replicate the results, access to a hosted model (e.g., in the case of a large language model), releasing of a model checkpoint, or other means that are appropriate to the research performed.
- While NeurIPS does not require releasing code, the conference does require all submissions to provide some reasonable avenue for reproducibility, which may depend on the nature of the contribution. For example
  - (a) If the contribution is primarily a new algorithm, the paper should make it clear how to reproduce that algorithm.
  - (b) If the contribution is primarily a new model architecture, the paper should describe the architecture clearly and fully.
  - (c) If the contribution is a new model (e.g., a large language model), then there should either be a way to access this model for reproducing the results or a way to reproduce the model (e.g., with an open-source dataset or instructions for how to construct the dataset).
  - (d) We recognize that reproducibility may be tricky in some cases, in which case authors are welcome to describe the particular way they provide for reproducibility. In the case of closed-source models, it may be that access to the model is limited in some way (e.g., to registered users), but it should be possible for other researchers to have some path to reproducing or verifying the results.

#### 5. Open access to data and code

Question: Does the paper provide open access to the data and code, with sufficient instructions to faithfully reproduce the main experimental results, as described in supplemental material?

Answer: [Yes]

Justification: All code and dataset are accessible from the provided website in the abstract.

Guidelines:

- The answer NA means that paper does not include experiments requiring code.
- Please see the NeurIPS code and data submission guidelines (<https://nips.cc/public/guides/CodeSubmissionPolicy>) for more details.
- While we encourage the release of code and data, we understand that this might not be possible, so “No” is an acceptable answer. Papers cannot be rejected simply for not including code, unless this is central to the contribution (e.g., for a new open-source benchmark).
- The instructions should contain the exact command and environment needed to run to reproduce the results. See the NeurIPS code and data submission guidelines (<https://nips.cc/public/guides/CodeSubmissionPolicy>) for more details.
- The authors should provide instructions on data access and preparation, including how to access the raw data, preprocessed data, intermediate data, and generated data, etc.
- The authors should provide scripts to reproduce all experimental results for the new proposed method and baselines. If only a subset of experiments are reproducible, they should state which ones are omitted from the script and why.
- At submission time, to preserve anonymity, the authors should release anonymized versions (if applicable).
- Providing as much information as possible in supplemental material (appended to the paper) is recommended, but including URLs to data and code is permitted.

## 6. Experimental setting/details

Question: Does the paper specify all the training and test details (e.g., data splits, hyper-parameters, how they were chosen, type of optimizer, etc.) necessary to understand the results?

Answer: [Yes]

Justification: The core setup is provided in the Experiment section. Further details are mentioned in the appendix.

Guidelines:

- The answer NA means that the paper does not include experiments.
- The experimental setting should be presented in the core of the paper to a level of detail that is necessary to appreciate the results and make sense of them.
- The full details can be provided either with the code, in appendix, or as supplemental material.

## 7. Experiment statistical significance

Question: Does the paper report error bars suitably and correctly defined or other appropriate information about the statistical significance of the experiments?

Answer: [Yes]

Justification: We provide error bars and shaded areas in the bar chart and curves to show the statistical significance.

Guidelines:

- The answer NA means that the paper does not include experiments.
- The authors should answer "Yes" if the results are accompanied by error bars, confidence intervals, or statistical significance tests, at least for the experiments that support the main claims of the paper.
- The factors of variability that the error bars are capturing should be clearly stated (for example, train/test split, initialization, random drawing of some parameter, or overall run with given experimental conditions).

- The method for calculating the error bars should be explained (closed form formula, call to a library function, bootstrap, etc.)
- The assumptions made should be given (e.g., Normally distributed errors).
- It should be clear whether the error bar is the standard deviation or the standard error of the mean.
- It is OK to report 1-sigma error bars, but one should state it. The authors should preferably report a 2-sigma error bar than state that they have a 96% CI, if the hypothesis of Normality of errors is not verified.
- For asymmetric distributions, the authors should be careful not to show in tables or figures symmetric error bars that would yield results that are out of range (e.g. negative error rates).
- If error bars are reported in tables or plots, The authors should explain in the text how they were calculated and reference the corresponding figures or tables in the text.

## 8. Experiments compute resources

Question: For each experiment, does the paper provide sufficient information on the computer resources (type of compute workers, memory, time of execution) needed to reproduce the experiments?

Answer: [Yes]

Justification: We mentioned the hardware in the Experiment section.

Guidelines:

- The answer NA means that the paper does not include experiments.
- The paper should indicate the type of compute workers CPU or GPU, internal cluster, or cloud provider, including relevant memory and storage.
- The paper should provide the amount of compute required for each of the individual experimental runs as well as estimate the total compute.
- The paper should disclose whether the full research project required more compute than the experiments reported in the paper (e.g., preliminary or failed experiments that didn't make it into the paper).

## 9. Code of ethics

Question: Does the research conducted in the paper conform, in every respect, with the NeurIPS Code of Ethics <https://neurips.cc/public/EthicsGuidelines>?

Answer: [Yes]

Justification: There is no human subject involved in the study.

Guidelines:

- The answer NA means that the authors have not reviewed the NeurIPS Code of Ethics.
- If the authors answer No, they should explain the special circumstances that require a deviation from the Code of Ethics.
- The authors should make sure to preserve anonymity (e.g., if there is a special consideration due to laws or regulations in their jurisdiction).

## 10. Broader impacts

Question: Does the paper discuss both potential positive societal impacts and negative societal impacts of the work performed?

Answer: [Yes]

Justification: The impact of enhancing spinal surgery is discussed in the introduction. The negative aspect (limited patient samples) is discussed in the limitations.

Guidelines:

- The answer NA means that there is no societal impact of the work performed.
- If the authors answer NA or No, they should explain why their work has no societal impact or why the paper does not address societal impact.

- Examples of negative societal impacts include potential malicious or unintended uses (e.g., disinformation, generating fake profiles, surveillance), fairness considerations (e.g., deployment of technologies that could make decisions that unfairly impact specific groups), privacy considerations, and security considerations.
- The conference expects that many papers will be foundational research and not tied to particular applications, let alone deployments. However, if there is a direct path to any negative applications, the authors should point it out. For example, it is legitimate to point out that an improvement in the quality of generative models could be used to generate deepfakes for disinformation. On the other hand, it is not needed to point out that a generic algorithm for optimizing neural networks could enable people to train models that generate Deepfakes faster.
- The authors should consider possible harms that could arise when the technology is being used as intended and functioning correctly, harms that could arise when the technology is being used as intended but gives incorrect results, and harms following from (intentional or unintentional) misuse of the technology.
- If there are negative societal impacts, the authors could also discuss possible mitigation strategies (e.g., gated release of models, providing defenses in addition to attacks, mechanisms for monitoring misuse, mechanisms to monitor how a system learns from feedback over time, improving the efficiency and accessibility of ML).

## 11. Safeguards

Question: Does the paper describe safeguards that have been put in place for responsible release of data or models that have a high risk for misuse (e.g., pretrained language models, image generators, or scraped datasets)?

Answer: [NA]

Justification: We develop a medical simulation platform for robot learning research, and we see no such risk for our approach.

Guidelines:

- The answer NA means that the paper poses no such risks.
- Released models that have a high risk for misuse or dual-use should be released with necessary safeguards to allow for controlled use of the model, for example by requiring that users adhere to usage guidelines or restrictions to access the model or implementing safety filters.
- Datasets that have been scraped from the Internet could pose safety risks. The authors should describe how they avoided releasing unsafe images.
- We recognize that providing effective safeguards is challenging, and many papers do not require this, but we encourage authors to take this into account and make a best faith effort.

## 12. Licenses for existing assets

Question: Are the creators or original owners of assets (e.g., code, data, models), used in the paper, properly credited and are the license and terms of use explicitly mentioned and properly respected?

Answer: [Yes]

Justification: We cited the dataset and code we used in the paper.

Guidelines:

- The answer NA means that the paper does not use existing assets.
- The authors should cite the original paper that produced the code package or dataset.
- The authors should state which version of the asset is used and, if possible, include a URL.
- The name of the license (e.g., CC-BY 4.0) should be included for each asset.
- For scraped data from a particular source (e.g., website), the copyright and terms of service of that source should be provided.



- If assets are released, the license, copyright information, and terms of use in the package should be provided. For popular datasets, [paperswithcode.com/datasets](https://paperswithcode.com/datasets) has curated licenses for some datasets. Their licensing guide can help determine the license of a dataset.
- For existing datasets that are re-packaged, both the original license and the license of the derived asset (if it has changed) should be provided.
- If this information is not available online, the authors are encouraged to reach out to the asset's creators.

### 13. New assets

Question: Are new assets introduced in the paper well documented and is the documentation provided alongside the assets?

Answer: [\[Yes\]](#)

Justification: The new assets are published on the Huggingface website and can be downloaded.

Guidelines:

- The answer NA means that the paper does not release new assets.
- Researchers should communicate the details of the dataset/code/model as part of their submissions via structured templates. This includes details about training, license, limitations, etc.
- The paper should discuss whether and how consent was obtained from people whose asset is used.
- At submission time, remember to anonymize your assets (if applicable). You can either create an anonymized URL or include an anonymized zip file.

### 14. Crowdsourcing and research with human subjects

Question: For crowdsourcing experiments and research with human subjects, does the paper include the full text of instructions given to participants and screenshots, if applicable, as well as details about compensation (if any)?

Answer: [\[NA\]](#)

Justification: There is no human subject involved in this work.

Guidelines:

- The answer NA means that the paper does not involve crowdsourcing nor research with human subjects.
- Including this information in the supplemental material is fine, but if the main contribution of the paper involves human subjects, then as much detail as possible should be included in the main paper.
- According to the NeurIPS Code of Ethics, workers involved in data collection, curation, or other labor should be paid at least the minimum wage in the country of the data collector.

### 15. Institutional review board (IRB) approvals or equivalent for research with human subjects

Question: Does the paper describe potential risks incurred by study participants, whether such risks were disclosed to the subjects, and whether Institutional Review Board (IRB) approvals (or an equivalent approval/review based on the requirements of your country or institution) were obtained?

Answer: [\[NA\]](#)

Justification: There is no human subject involved.

Guidelines:

- The answer NA means that the paper does not involve crowdsourcing nor research with human subjects.
- Depending on the country in which research is conducted, IRB approval (or equivalent) may be required for any human subjects research. If you obtained IRB approval, you should clearly state this in the paper.

993           • We recognize that the procedures for this may vary significantly between institutions  
994           and locations, and we expect authors to adhere to the NeurIPS Code of Ethics and the  
995           guidelines for their institution.  
996           • For initial submissions, do not include any information that would break anonymity (if  
997           applicable), such as the institution conducting the review.

998 **16. Declaration of LLM usage**

999       Question: Does the paper describe the usage of LLMs if it is an important, original, or  
1000       non-standard component of the core methods in this research? Note that if the LLM is used  
1001       only for writing, editing, or formatting purposes and does not impact the core methodology,  
1002       scientific rigorousness, or originality of the research, declaration is not required.

1003       Answer: [NA]

1004       Justification: LLM is not involved in the core method.

1005       Guidelines:

1006           • The answer NA means that the core method development in this research does not  
1007           involve LLMs as any important, original, or non-standard components.  
1008           • Please refer to our LLM policy (<https://neurips.cc/Conferences/2025/LLM>)  
1009           for what should or should not be described.
